# Supplementary material for: Ligation of Left Gastric Vein May Cause Delayed Gastric Emptying After Pancreatoduodenectomy: A Retrospective Study
Source: Research Square preprint supplement (doi:10.21203/rs.3.rs-1406827/v1), 2022-03-01
Supplement: Supplementary file 1 [file 5844cf0faf4c1d9282daa0b1.docx]

**Additional File 3.** Effect of left gastric vein ligation on delayed gastric emptying after subtotal stomach-preserving pancreatoduodenectomy in the absence of grade B or C pancreatic fistula group

|  | LGV ligation, yes (n=9) | LGV ligation, no (n=61) | *P*-value |
| --- | --- | --- | --- |
| DGE (yes, %) | 3 (33.3) | 6 (10.3) | 0.0493 |

DGE, delayed gastric emptying; LGV, left gastric vein
