# Supplementary material for: Ligation of Left Gastric Vein May Cause Delayed Gastric Emptying After Pancreatoduodenectomy: A Retrospective Study
Source: Research Square preprint supplement (doi:10.21203/rs.3.rs-1406827/v1), 2022-03-01
Supplement: Supplementary file 2 [file 9c174c7c95cbcb9d0fb00558.docx]

**Additional File 5.** Effect of left gastric vein ligation on delated gastric emptying after subtotal stomach-preserving pancreatoduodenectomy in the Billroth II reconstruction group

|  | LGV ligation, yes (n=8) | LGV ligation, no (n=42) | *P*-value |
| --- | --- | --- | --- |
| DGE (yes, %) | 7 (87.5) | 6 (14.3) | 0.0012 |

DGE, delayed gastric emptying; LGV, left gastric vein
